# Supplementary material for: Amorphous FeCoNiBOx nanosheets as highly active and durable electrocatalysts for oxygen evolution reaction in alkaline electrolyte
Source: Royal Society of Chemistry journal article supplement (doi:10.1039/d2nj04864g), 2022-01-01
Supplement: d2nj04864g1.pdf [file d2nj04864g1.pdf]

# Amorphous FeCoNiBO<sub>x</sub> Nanosheets as Highly Active and Durable Electrocatalysts for Oxygen Evolution Reaction in Alkaline Electrolyte

Dan Wang,<sup>\*a,b,c,d</sup> Xiangping Feng,<sup>a</sup> Huan He,<sup>a</sup> Zhiyuan Wang,<sup>\*a,b,c</sup> Runguo Zheng,<sup>a,b,c</sup> Hongyu

Sun,<sup>b</sup> Yanguo Liu,<sup>a,b,c</sup> Chunli Liu<sup>d</sup>

<sup>a</sup> School of Materials Science and Engineering, Northeastern University, Shenyang 110819, P.R. China;

<sup>b</sup> School of Resources and Materials, Northeastern University at Qinhuangdao, Qinhuangdao 066004, P.R.China;

<sup>c</sup> Key Laboratory of Dielectric and Electrolyte Functional Material Hebei Province, Qinhuangdao 066004, China

<sup>d</sup> Department of Physics and Oxide Research Center, Hankuk University of Foreign Studies, Yongin, 17035,

Republic of Korea

Corresponding author: (D Wang) [869997791@qq.com](mailto:869997791@qq.com); (Z-Y Wang) [zhiyuanwang@neuq.edu.cn](mailto:zhiyuanwang@neuq.edu.cn);

## 1. Experimental Section

### 1.1 Chemicals

FeCl<sub>2</sub>·4H<sub>2</sub>O (99%), CoCl<sub>2</sub>·6H<sub>2</sub>O (98%), NiCl<sub>2</sub>·6H<sub>2</sub>O (98%), potassium hydroxide (KOH), polyvinylpyrrolidone (PVP), and diethylene glycol (DEG) were purchased from Shanghai Aladdin, China. Anhydrous ethanol and NaBH<sub>4</sub> was purchased from Xinbote Chemical Co., Ltd. and Tianjin Obokai Chemical Co., Ltd, respectively.

### 1.2 Catalysts synthesis

The FeCoNiBO<sub>x</sub> was synthesized through a low-temperature chemical reduction method. Firstly, FeCl<sub>2</sub>·4H<sub>2</sub>O, CoCl<sub>2</sub>·6H<sub>2</sub>O, NiCl<sub>2</sub>·6H<sub>2</sub>O in equimolar ratio according to the designed composition (a total of 1 mmol) were dissolved in DEG (5 mL). The

mixed solution was continuously stirred for 2 h until a clear and transparent metal salt precursor solution was obtained. Meanwhile, a solution was prepared by mixing  $\text{NaBH}_4$  (5 mmol) with a mixture of DEG (30 mL)/PVP (5 mmol) that was kept in the ice-bath for 10 minutes. Then the above two solutions were mixed together and vigorously stirred for 30 minutes. The obtained reaction product  $\text{FeCoNiBO}_x$  was washed several times with absolute ethanol and deionized water followed by centrifugation and finally dried in air at 40 °C for 8 hours.

### 1.3 Materials characterizations

The crystallinity of  $\text{FeCoNiBO}_x$  was detected using an X-ray diffractometer (XRD SMARTLAB 9) from 10°–80° with a scanning rate of 5° min<sup>-1</sup>. Scanning electron microscopy (SEM, ZEISS SUPRA55, scanning voltage @ 15 k V) and energy dispersive spectroscopy (EDS) were used to obtain the morphology and elemental composition of the samples. Transmission electron microscopy (TEM, Thermo Fischer, 200 kV) was used to further investigate the microstructure of the sample. The surface chemical state of  $\text{FeCoNiBO}_x$  before and after the reaction was obtained by X-ray photoelectron spectroscopy (XPS, Thermo Scientific K- Alpha).

### 1.4 Electrode Preparation

5 mg  $\text{FeCoNiBO}_x$  powder and 1.5 mg carbon black treated with  $\text{HNO}_3$  were first dissolved in 0.5 ml N, N-Dimethylformamide (DMF), and mixed with 10  $\mu\text{l}$  nafion. The obtained solution was sonicated for 60 min to form a uniform ink. The  $\text{FeCoNiBO}_x$  electrode was prepared by spreading 20  $\mu\text{l}$  ink on a piece of carbon paper of 3\*3 mm<sup>2</sup>.

### 1.5 Electrochemical measurements

Electrochemical measurements were carried out using a typical three-electrode system soaked in 1 M KOH solution and connected to an electrochemical workstation (CHI 760E). The as-prepared carbon paper, Pt sheet, and Hg/HgO were used as the working, counter, and reference electrode, respectively. The reference electrode was calibrated according to the reversible hydrogen electrode (RHE) in an O<sub>2</sub> saturated solution. Linear sweep voltammetry (LSV) test was performed at a scan rate of 1 mV s<sup>-1</sup> without IR compensation. Before the LSV measurement, the samples were activated by cyclic voltammetry test (CVs) for 20 cycles. The electrochemical impedance spectroscopy (EIS) measurement was performed in a frequency range from 100 k to 0.1 Hz with an amplitude of 5 mV. All voltages were calibrated to RHE by the equation:

$$E(\text{RHE}) = E(\text{Hg/HgO}) + 0.059 \text{ pH} + 0.098 \text{ V}.$$

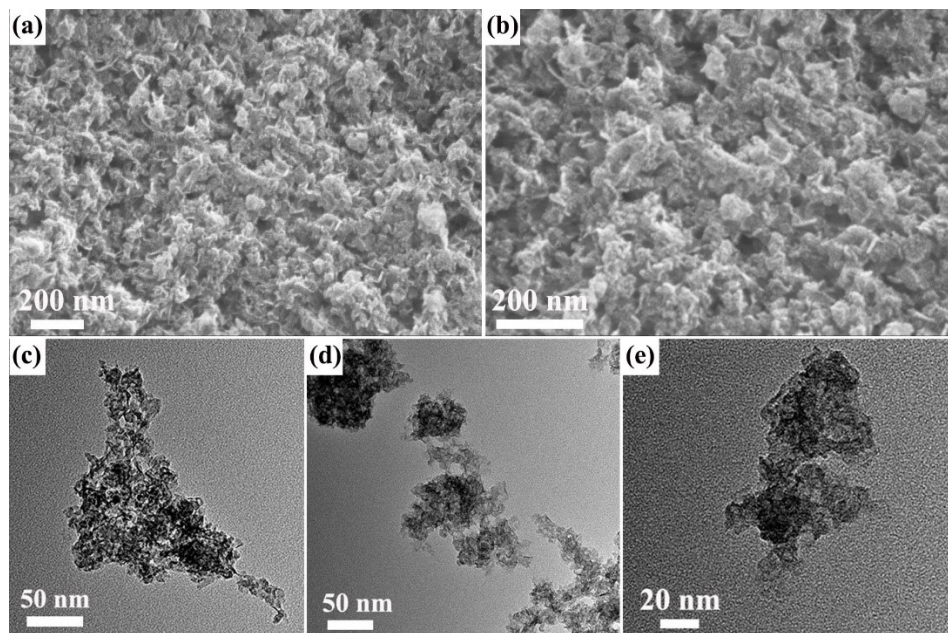

Fig. S1 SEM (a, b) and TEM (c, d, e) of  $\text{FeCoNiBO}_x$ .

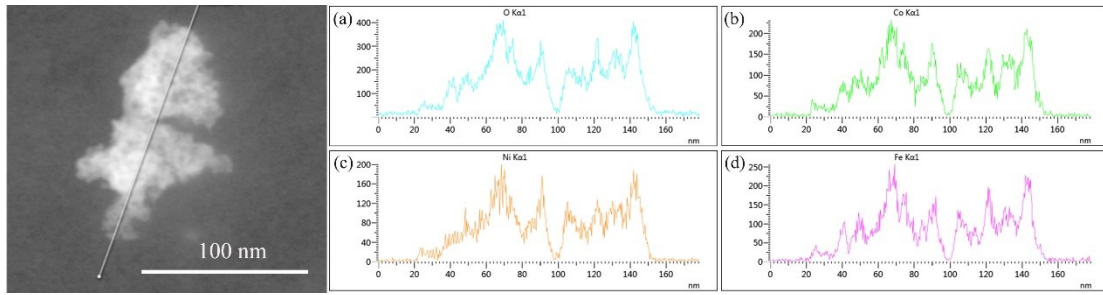

Fig. S2. Line scan and element distribution images of  $\text{FeCoNiBO}_x$

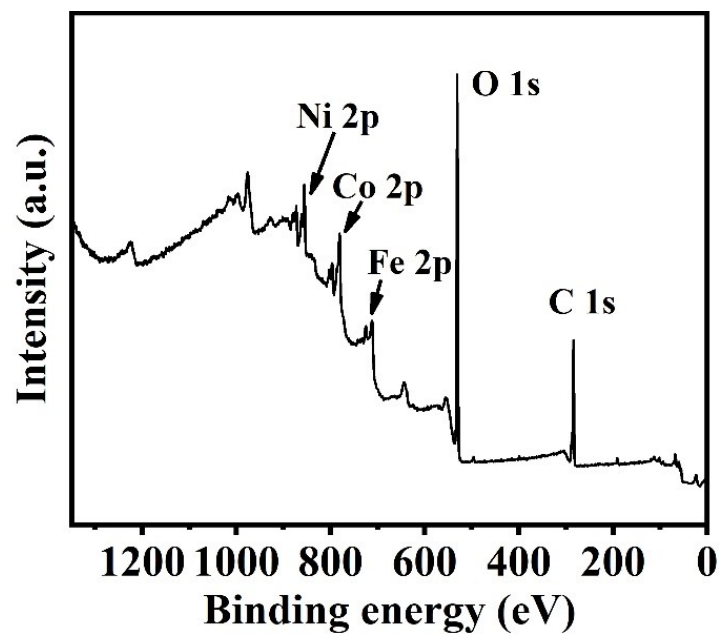

Fig. S3 XPS full spectra of FeCoNiBO<sub>x</sub>.

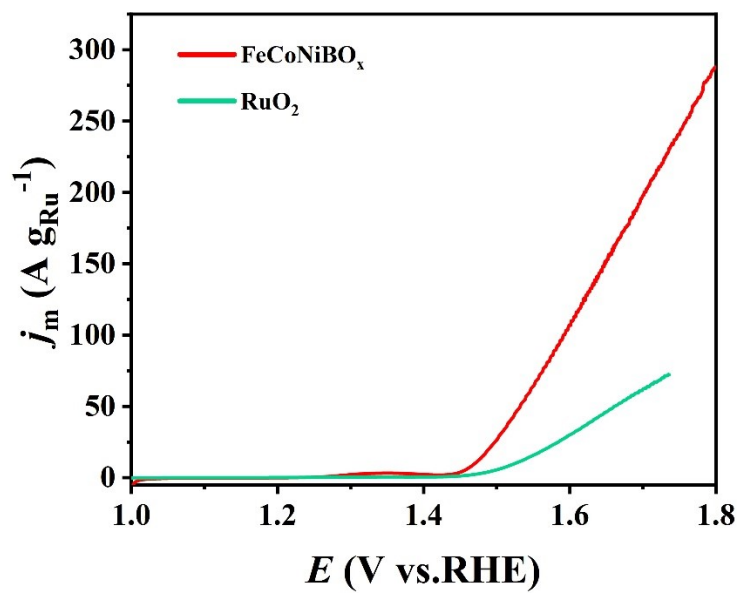

Fig. S4 LSV curves of  $\text{FeCoNiBO}_x$  and  $\text{RuO}_2$ .

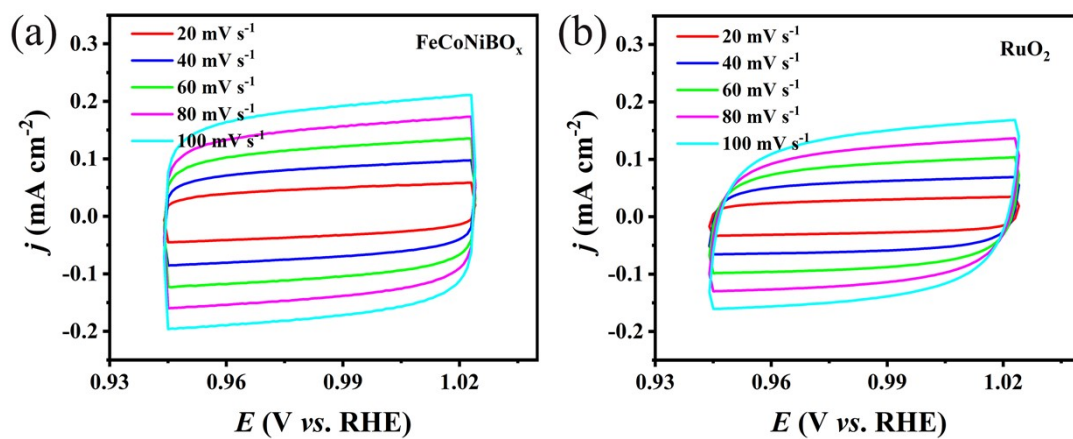

Fig. S5 Cyclic voltammetry curves with different scanning speeds (20, 40, 60, 80, 100 mV s<sup>-1</sup>) of (a) FeCoNiBO<sub>x</sub> and (b) RuO<sub>2</sub>.



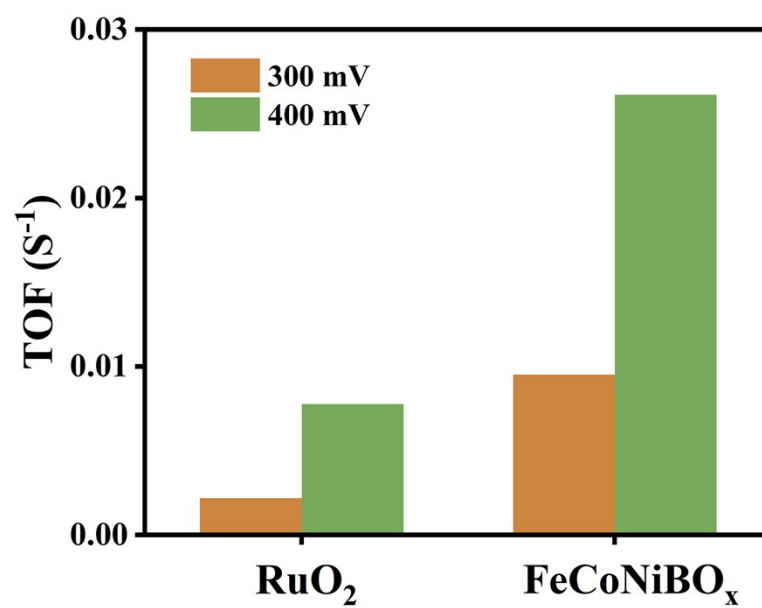

Fig. S6 TOF of  $FeCoNiBO_x$  and  $RuO_2$ .

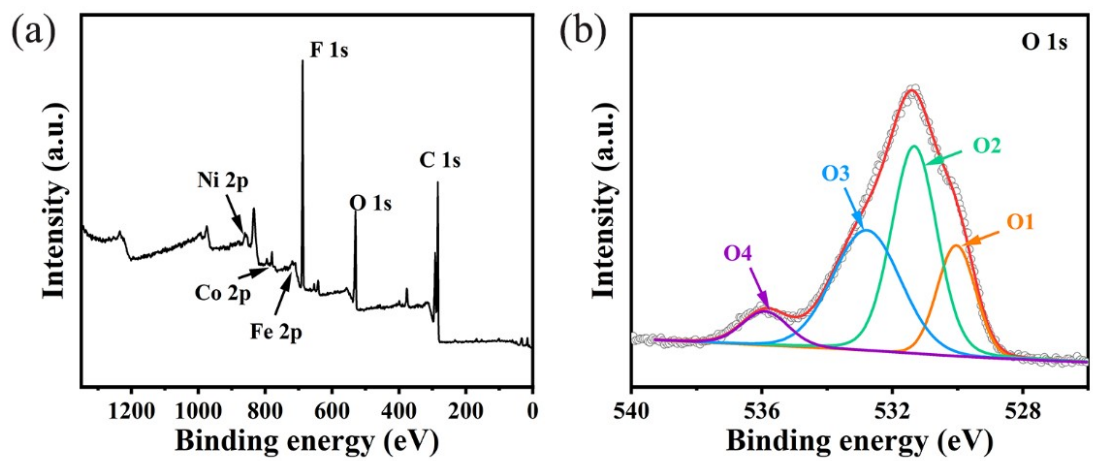

Fig. S7 (a) XPS full spectra and (b) O 1s spectrum of FeCoNiBO<sub>x</sub> after OER.

Table S1. Comparison of the OER performances of FeCoNiBO<sub>x</sub> and the recently reported electrocatalysts

| Catalysts                                   | Overpotential<br>/mV | Tafel slope/mV dec <sup>-1</sup> | Electrolyte | Ref.      |
|---------------------------------------------|----------------------|----------------------------------|-------------|-----------|
| NixB                                        | 280                  | 89                               | 1 M KOH     | 1         |
| FeB <sub>2</sub>                            | 296                  | 52.4                             | 1 M KOH     | 2         |
| FeCo <sub>2,3</sub> NiB                     | 274                  | 38                               | 1 M KOH     | 3         |
| Cox-Fe-B                                    | 298                  | 62.6                             | 1 M KOH     | 4         |
| Ni-B                                        | 360                  | 76                               | 1 M KOH     | 5         |
| NiB on Ni <sub>3</sub> B                    | 302                  | 52                               | 1 M KOH     | 6         |
| Co <sub>2</sub> B                           | 287                  | 50.7                             | 1 M KOH     | 7         |
| Ni <sub>3</sub> B/rGO                       | 290                  | 88.4                             | 1 M KOH     | 8         |
| NiB <sub>0.45</sub> /NiOx                   | 296                  | 58                               | 1 M KOH     | 9         |
| NixB/f-MWCNT                                | 286                  | 46.3                             | 1 M KOH     | 10        |
| FeNi <sub>3</sub> -B/G                      | 230                  | 50                               | 1 M KOH     | 11        |
| Co-P-B                                      | 290                  | 42                               | 1 M KOH     | 12        |
| Co-B/NF                                     | 265                  | 55.6                             | 1 M KOH     | 13        |
| NiCoFeB                                     | 284                  | 46                               | 1 M KOH     | 14        |
| Co-Bi/G                                     | 290                  | 53                               | 1 M KOH     | 15        |
| Ni-Bi/rGO                                   | 329                  | 79                               | 1 M KOH     | 16        |
| Ni-Bi@NiB                                   | 302                  | 52                               | 1 M KOH     | 17        |
| Ni-Fe-Bi                                    | 230                  | 32                               | 1 M KOH     | 18        |
| NiFe@NiFeBi/CC                              | 294                  | 96                               | 1 M KOH     | 19        |
| NiCo-Bi/CC                                  | 388                  | 142                              | 1 M KOH     | 20        |
| Ni-Bi/CC                                    | 407                  | 117                              | 1 M KOH     | 21        |
| Co <sub>0.75</sub> Fe <sub>0.25</sub> Bi/CP | 227                  | 43.2                             | 1 M KOH     | 22        |
| FeBi@FeNi LDH                               | 246                  | 56.48                            | 1 M KOH     | 23        |
| FeCoNiBO <sub>x</sub>                       | 245                  | 59.4                             | 1 M KOH     | This work |

Table S2. Atomic ratio from EDS and XPS.

| <b>Element</b> | <b>EDS</b> | <b>XPS</b> |
|----------------|------------|------------|
| <b>Fe2p</b>    | 10.60      | 9.16       |
| <b>Co2p</b>    | 11.31      | 8.81       |
| <b>Ni2p</b>    | 10.98      | 8.58       |
| <b>B1s</b>     | -          | 8.25       |
| <b>O1s</b>     | 67.11      | 65.20      |

Table S3. Chemical composition of FeCoNiBO<sub>x</sub> at initial and after 40 h.

| ID         | Fe <sup>3+</sup> /Fe <sup>2+</sup> | Co <sup>3+</sup> /Co <sup>2+</sup> | Ni <sup>3+</sup> /Ni <sup>2+</sup> |
|------------|------------------------------------|------------------------------------|------------------------------------|
| Initial    | 0.57                               | 1.94                               | -                                  |
| After 40 h | 1.4                                | 2.80                               | 0.6                                |

## References

- 1 J. Masa, I. Sinev, H. Mistry, E. Ventosa, M. Mata, J. Arbiol, M. Muhler, B. R. Cuenya and W. Schuhmann, *Adv. Energy Mater.*, 2017, **7**, 1700381.
- 2 H. Li, P. Wen, Q. Li, C. Dun, J. Xing, C. Lu, S. Adhikari, L. Jiang, D. L. Carroll and S. M. Geyer, *Adv. Energy Mater.*, 2017, **7**, 1700513.
- 3 J. M. V. Nsanzimana, Y. Peng, Y. Y. Xu, L. Thia, C. Wang, B. Y. Xia and X. Wang, *Adv. Energy Mater.*, 2018, **8**, 1701475.
- 4 H. Chen, S. Ouyang, M. Zhao, Y. Li and J. Ye, *ACS Appl. Mater. Interfaces*, 2017, **9**, 40333–40343.
- 5 Y. Liang, X. Sun, A. M. Asiri and Y. He, *Nanotechnology*, 2016, **27**, 12.
- 6 W. J. Jiang, S. Niu, T. Tang, Q. H. Zhang, X. Z. Liu, Y. Zhang, Y. Y. Chen, J. H. Li, L. Gu, L. J. Wan and J. S. Hu, *Angew. Chem., Int. Ed.*, 2017, **56**, 6572-6577.
- 7 X. Ma, J. Wen, S. Zhang, H. Yuan, K. Li, F. Yan, X. Zhang and Y. Chen, *ACS Sustainable Chem. Eng.*, 2017, **5**, 10266-10274.
- 8 M. Arivu, J. Masud, S. Umapathi and M. Nath, *Electrochem. Commun.*, 2018, **86**, 121-125.
- 9 J. Jiang, M. Wang, W. Yan, X. Liu, J. Liu, J. Yang and L. Sun, *Nano Energy*, 2017, **38**, 175-184.
- 10 X. Chen, Z. Yu, L. Wei, Z. Zhou, S. Zhai, J. Chen, Y. Wang, Q. Huang, H. E. Karahan, X. Liao and Y. Chen, *J. Mater. Chem. A*, 2019, **7**, 764-774.
- 11 J. M. V. Nsanzimana, R. Dangol, V. Reddu, S. Duo, Y. C. Peng, K. N. Dinh, Z. F. Huang, Q. Y. Yan and X. Wang, *ACS Appl. Mater. Interfaces*, 2019, **11**, 846-855.
- 12 X. Chen, Z. Yu, L. Wei, Z. Zhou, S. Zhai, J. Chen, Y. Wang, Q. Huang, H. E. Karahan, X. Liao and Y. Chen, *J. Mater. Chem. A*, 2019, **7**, 764-774.
- 13 Y. Jiang, Y. Fang, C. Chen, P. Ni, B. Kong, Z. Song, Y. Lu and L. Niu, *ChemElectroChem*, 2019, **6**, 3684-3689.
- 14 Y. Li, B. Huang, Y. Sun, M. Luo, Y. Yang, Y. Qin, L. Wang, C. Li, F. Lv, W. Zhang and S. Guo, *Small*, 2019, **15**, 1804212.
- 15 W. J. Jiang, S. Niu, T. Tang, Q. H. Zhang, X. Z. Liu, Y. Zhang, Y. Y. Chen, J. H. Li, L. Gu and L. J. Wan, *Angew. Chem. Int. Ed.*, 2017, **56**, 6572-6577.
- 16 K. Dang, X. Chang, T. Wang and J. Gong, *Nanoscale*, 2017, **9**, 16133-16137.
- 17 L. Cui, D. Liu, S. Hao, F. Qu, G. Du, J. Liu, A. M. Asiri and X. Sun, *Nanoscale*, 2017, **9**, 3752-3756.
- 18 N. Wang, Z. Cao, X. B. Kong, J. H. Liang, Q. X. Zhang, L. R. Zheng, C. C. Wei, X. L. Chen, Y. Zhao, L. Cavallo, B. Zhang and X. Zhang, *J. Mater. Chem. A*, 2018, **6**, 16959-16964.
- 19 X. Cao, L. Cui, X. Wang, W. Yang and J. Liu, *ChemCatChem*, 2018, **10**, 2826-2832.
- 20 M. Ma, F. Qu, X. Ji, D. Liu, S. Hao, G. Du, A. M. Asiri, Y. Yao, L. Chen and X. Sun, *Small*, 2017, **13**, 1700394.
- 21 X. Ji, L. Cui, D. Liu, S. Hao, J. Liu, F. Qu, Y. Ma, G. Du, A. M. Asiri and X. Sun, *ChemCommun*, 2017, **53**, 3070-3073.
- 22 H. Liu, L. Yang, K. Qiao, L. Zheng, X. Cao and D. Cao, *Chem. Sus. Chem.*, 2019, **12**, 3524-3531.

23 F. G. Wang, B. Liu, H. Y. Wang, Z. Y. Lin, Y. W. Dong, N. Yu, R. N. Luan, Y. M. Chai and B. Dong, *J. Colloid Interface Sci.*, 2022, 173-181.
